# Supplementary material for: Small molecule activation of metabolic enzyme pyruvate kinase muscle isozyme 2, PKM2, circumvents photoreceptor apoptosis
Source: PubMed Central journal article supplement (PMC7031539; doi:10.1038/s41598-020-59999-w), 2020-02-19
Supplement: 41598_2020_59999_MOESM1_ESM.pdf [file 41598_2020_59999_MOESM1_ESM.pdf]

**Small molecule activation of metabolic enzyme pyruvate kinase muscle isozyme 2, PKM2, circumvents photoreceptor apoptosis**

Thomas J. Wubben, MD, PhD<sup>1</sup>; Mercy Pawar, MS<sup>1</sup>; Eric Weh, PhD<sup>1</sup>; Andrew Smith, BS<sup>1</sup>; Peter Sajjakulnukit, BS<sup>2</sup>; Li Zhang, PhD<sup>3</sup>; Lipeng Dai, PhD<sup>4</sup>; Heather Hager, MS<sup>1</sup>; Manjunath P. Pai, PharmD<sup>4</sup>; Costas A. Lyssiotis, PhD<sup>2</sup>; \*Cagri G. Besirli, MD, PhD<sup>1</sup>

**Affiliations:** <sup>1</sup>University of Michigan, Kellogg Eye Center, Department of Ophthalmology and Visual Sciences; <sup>2</sup>University of Michigan, Department of Molecular and Integrative Physiology; <sup>3</sup>University of Michigan Biomedical Research Core Facilities, Metabolomics Core; <sup>4</sup> University of Michigan, College of Pharmacy

**Address correspondence to:** Cagri G. Besirli; University of Michigan, Kellogg Eye Center 1000 Wall St, Ann Arbor, MI 48105, cbesirli@med.umich.edu, phone: (734)-232-8404

**Figure S1. Metabolic comparison between wild-type mouse and rat retina.** (a) Volcano plot showing significantly altered metabolites between wild-type C57BL/6J mouse retina and Brown-Norway rat retina. The vertical dashed lines represent a fold change of 1.5 and the horizontal dashed line depicts a p-value of 0.05. (b) Metabolic pathway impact analysis of significantly altered metabolites by Metaboanalyst 4.0 in wild-type C57BL/6J mouse retina as compared to wild-type Brown-Norway rat retina.

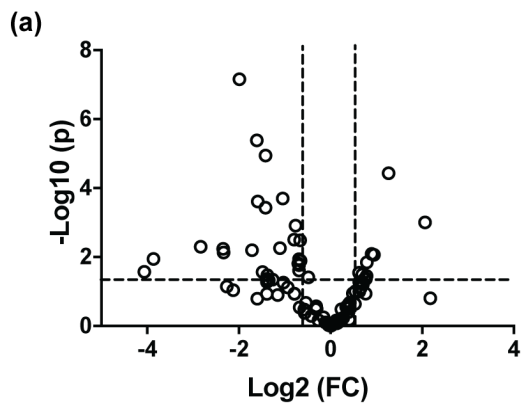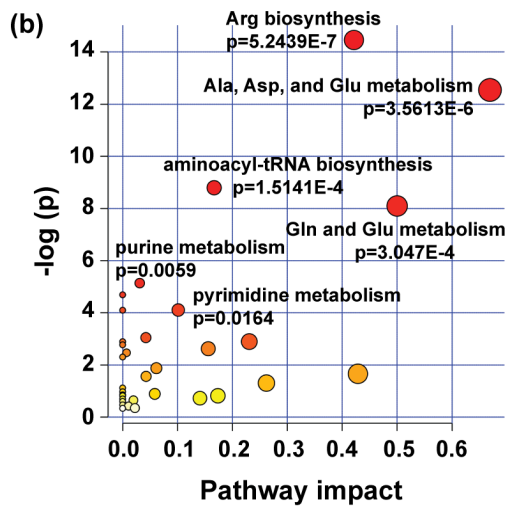

**Table S1. List of metabolites and their parameters detected by LC/MS.**

| Compound Name                    | Precursor Ion (Da) | Product Ion (Quantifier) (Da) | Product Ion (Qualifier) (Da) | Retention Time (min) | Collision Energy (Volts) |
|----------------------------------|--------------------|-------------------------------|------------------------------|----------------------|--------------------------|
| ±-Mevalonolactone                | 189.1              | 59.1                          |                              | 2.91                 | 6                        |
| 2-2-Dimethyl Succinic acid       | 145.1              | 101.1                         |                              | 14                   | 11                       |
|                                  | 145.1              |                               | 127.1                        | 14                   | 8                        |
| 2-3-Dihydroxybenzoic acid        | 153                | 109                           |                              | 14.5                 | 15                       |
|                                  | 153                |                               | 53.2                         | 14.5                 | 25                       |
| 2-3-Dihydroxyisovalerate         | 133.1              | 75.1                          |                              | 10.8                 | 10                       |
|                                  | 133.1              |                               | 57.2                         | 10.8                 | 15                       |
| 2-3-Pyridinedicarboxylic acid    | 166                | 122                           |                              | 14.9                 | 6                        |
|                                  | 166                |                               | 78.1                         | 14.9                 | 13                       |
| 2-4-Quinolinediol                | 160                | 117.9                         |                              | 15.2                 | 19                       |
|                                  | 160                |                               | 42.2                         | 15.2                 | 29                       |
| 2-Deoxyadenosine                 | 250                | 134.05                        |                              | 6.5                  | 12                       |
|                                  | 310.1              | 250                           |                              | 6.5                  | 4                        |
| 2-Deoxyadenosine 5-diphosphate   | 410                | 79.1                          |                              | 15.7                 | 44                       |
|                                  | 410                |                               | 158.7                        | 15.7                 | 24                       |
| 2-Deoxyadenosine 5-monophosphate | 330                | 79                            |                              | 12.7                 | 48                       |
|                                  | 330                |                               | 134.05                       | 12.7                 | 28                       |
| 2-Deoxycytidine                  | 286.1              | 226                           |                              | 2                    | 4                        |
|                                  | 286.1              |                               | 93                           | 2                    | 20                       |
| 2-Deoxycytidine 5-diphosphate    | 386                | 79                            |                              | 14.7                 | 36                       |
|                                  | 386                |                               | 97                           | 14.7                 | 20                       |
| 2-Deoxycytidine 5-monophosphate  | 306                | 79                            |                              | 10.4                 | 44                       |
|                                  | 306                |                               | 194.9                        | 10.4                 | 14                       |
| 2-Deoxy-D-glucose 6-phosphate    | 243                | 79.1                          |                              | 9.1                  | 45                       |
|                                  | 243                |                               | 97                           | 9.1                  | 14                       |
| 2-Deoxy-D-ribose                 | 193.1              | 59.2                          |                              | 1.4                  | 16                       |
|                                  | 193.1              |                               | 133                          | 1.4                  | 0                        |
| 2-Deoxyguanosine                 | 266.1              | 150                           |                              | 4                    | 12                       |
|                                  | 266.1              |                               | 108                          | 4                    | 36                       |
| 2-Deoxyguanosine 5-diphosphate   | 426                | 79.1                          |                              | 15.4                 | 48                       |
|                                  | 426                |                               | 158.9                        | 15.4                 | 28                       |
| 2-Deoxyguanosine 5-monophosphate | 346                | 79.1                          |                              | 12.6                 | 48                       |
|                                  | 346                |                               | 97                           | 12.6                 | 36                       |
| 2-Deoxyinosine                   | 251.1              | 135                           |                              | 3.7                  | 20                       |
|                                  | 251.1              |                               | 108                          | 3.7                  | 42                       |
| 2-Deoxyribose 5-phosphate        | 213                | 79.1                          |                              | 9.23                 | 40                       |
|                                  | 213                |                               | 96.9                         | 9.23                 | 12                       |
| 2-Deoxyuridine                   | 227.1              | 184                           |                              | 2.7                  | 6                        |
|                                  | 227.1              |                               | 42.2                         | 2.7                  | 20                       |
| 2-Deoxyuridine 5-triphosphate    | 467                | 158.8                         |                              | 16.8                 | 36                       |
|                                  | 467                |                               | 368.9                        | 16.8                 | 20                       |
| 2-Isopropylmalic acid            | 175.1              | 113                           |                              | 15.5                 | 13                       |
|                                  | 175.1              |                               | 115                          | 15.5                 | 13                       |
| 2-Ketobutyrate                   | 101                | 57.2                          |                              | 12.4                 | 4                        |
| 2-Methyl-1-butanol               | 87.1               | 43.3                          |                              | 9.6                  | 5                        |
| 2-Phosphoglyceric acid           | 185                | 97                            |                              | 14.8                 | 14                       |
|                                  | 185                |                               | 79                           | 14.8                 | 37                       |
| 3-2-Hydroxyethylindole           | 160.1              | 130.06                        |                              | 15.4                 | 14                       |
|                                  | 160.1              |                               | 142.07                       | 15.4                 | 16                       |
| 3-Dehydroshikimic acid           | 171                | 127                           |                              | 7.4                  | 8                        |
|                                  | 171                |                               | 109                          | 7.4                  | 17                       |

|                                    |       |       |        |      |    |
|------------------------------------|-------|-------|--------|------|----|
| 3-Hydroxyanthranilic acid          | 152   | 108   |        | 12.1 | 12 |
|                                    | 152   |       | 107    | 12.1 | 23 |
| 3-Hydroxy-DL-kynurenine            | 223.1 | 205.9 |        | 2.3  | 4  |
|                                    | 223.1 |       | 162    | 2.3  | 10 |
| 3-Hydroxyphenylacetic acid         | 151   | 107.1 |        | 14.2 | 4  |
|                                    | 151   |       | 65.2   | 14.2 | 26 |
| 3-Indoleacetic acid                | 174.1 | 130   |        | 16.5 | 7  |
|                                    | 174.1 |       | 128    | 16.5 | 19 |
| 3-Methylglutaric acid              | 145.1 | 101.1 |        | 14.1 | 11 |
|                                    | 145.1 |       | 41.3   | 14.1 | 52 |
| 4-Aminobenzoic acid                | 136   | 92    |        | 9.8  | 8  |
| 4-Guanidobutyric acid              | 144.1 | 102   |        | 1.4  | 8  |
|                                    | 144.1 |       | 41.2   | 1.4  | 32 |
| 4-Hydroxybenzoic acid              | 137   | 93    |        | 12.1 | 14 |
|                                    | 137   |       | 65.2   | 12.1 | 34 |
| 4-Hydroxy-L-glutamic acid          | 162   | 144   |        | 5.3  | 6  |
|                                    | 162   |       | 72.1   | 5.3  | 16 |
| 4-Hydroxyphenyl-pyruvic acid       | 179   | 107   |        | 14.7 | 4  |
| 4-Methyl-2-oxovaleric acid         | 129.1 | 85.1  |        | 13.7 | 7  |
| 4-Pyridoxic acid                   | 182   | 138   |        | 15.3 | 12 |
|                                    | 182   |       | 108.1  | 15.3 | 20 |
| 4-Quinolinol                       | 144   | 66.1  |        | 9.2  | 44 |
|                                    | 144   |       | 116    | 9.2  | 28 |
| 5-Deoxy-5-(methylthio)adenosine    | 356.1 | 134   |        | 11.8 | 12 |
|                                    | 356.1 |       | 296    | 11.8 | 4  |
| 5-Hydroxy-3-indoleacetic acid      | 190.1 | 144   |        | 13   | 21 |
|                                    | 190.1 |       | 116    | 13   | 46 |
| 5-Methoxytryptamine                | 189.1 | 144   |        | 2.4  | 28 |
|                                    | 189.1 |       | 174    | 2.4  | 12 |
| 6-Hydroxynicotinic acid            | 138   | 94.1  |        | 9    | 10 |
|                                    | 138   |       | 42.3   | 9    | 27 |
| Adenine                            | 134   | 107   |        | 2.8  | 18 |
|                                    | 134   |       | 92.1   | 2.8  | 20 |
| Adenosine                          | 266   | 134   |        | 6.4  | 10 |
|                                    | 326.1 | 134   |        | 6.4  | 20 |
| Adenosine 3-5-cyclic monophosphate | 328   | 134   |        | 13.4 | 24 |
|                                    | 328   |       | 79     | 13.4 | 48 |
| Adenosine 5-diphosphate            | 426   | 159   |        | 15.4 | 28 |
|                                    | 426   |       | 328    | 15.4 | 16 |
| Adenosine 5-monophosphate          | 346   | 79    |        | 11.6 | 38 |
|                                    | 346   |       | 97     | 11.6 | 24 |
| Adenosine 5-triphosphate           | 506   | 408.1 |        | 17.2 | 22 |
|                                    | 506   |       | 159    | 17.2 | 38 |
| Adenylosuccinic acid               | 462   | 97    |        | 16.4 | 24 |
|                                    | 462   |       | 134.05 | 16.4 | 48 |
| Adipic acid                        | 145.1 | 101.1 |        | 13.9 | 11 |
|                                    | 145.1 |       | 83.1   | 13.9 | 12 |
| AICAR                              | 257.1 | 125   |        | 2.3  | 10 |
|                                    | 257.1 |       | 42.2   | 2.3  | 44 |
| Allantoin                          | 157   | 42.2  |        | 1.3  | 16 |
|                                    | 157   |       | 97     | 1.3  | 12 |
| alpha-D(+)Mannose 1-phosphate      | 259   | 79    |        | 7.6  | 48 |
|                                    | 259   |       | 97     | 7.6  | 14 |
| alpha-D-Glucose-1-phosphate        | 259   | 79    |        | 7.6  | 28 |
|                                    | 259   |       | 240.9  | 7.6  | 9  |
| alpha-Ketoglutaric acid            | 145   | 101   |        | 14.3 | 5  |

|                                        |        |        |        |      |    |
|----------------------------------------|--------|--------|--------|------|----|
|                                        | 145    |        | 57.2   | 14.3 | 9  |
| Arabinose-5-phosphate                  | 229    | 79     |        | 8.4  | 36 |
|                                        | 229    |        | 97     | 8.4  | 8  |
| Argininosuccinic acid                  | 289    | 88     |        | 4.6  | 36 |
|                                        | 289    |        | 131.1  | 4.6  | 27 |
| beta-Nicotinamide adenine dinucleotide | 662.1  | 540    |        | 9.5  | 12 |
|                                        | 662.1  |        | 327.9  | 9.5  | 36 |
| beta-Nicotinamide mononucleotide       | 333    | 251.1  |        | 3.7  | 12 |
|                                        | 333    |        | 135.1  | 3.7  | 36 |
| Cellobiose                             | 341.1  | 161    |        | 1.3  | 5  |
| Chorismic acid                         | 225    | 189    |        | 6.7  | 6  |
| cis-Aconitic acid                      | 173    | 129    |        | 15.5 | 4  |
|                                        | 173    |        | 85.1   | 15.5 | 8  |
| Citramalic acid                        | 147    | 85.1   |        | 13.8 | 12 |
|                                        | 147    |        | 87     | 13.8 | 14 |
| Citric acid                            | 191    | 111.01 |        | 14.9 | 10 |
|                                        | 191    |        | 87.01  | 14.9 | 16 |
| CoA                                    | 766.1  | 408.1  |        | 17.8 | 40 |
|                                        | 766.1  |        | 686.2  | 17.8 | 40 |
| Creatine                               | 130.1  | 88.1   |        | 1.3  | 8  |
|                                        | 130.1  |        | 41.2   | 1.3  | 36 |
| Creatine phosphate                     | 210    | 79     |        | 7    | 16 |
|                                        | 210    |        | 96.9   | 7    | 4  |
| Creatinine                             | 112    | 41.2   |        | 1.35 | 24 |
|                                        | 112    |        | 68.1   | 1.35 | 16 |
| Cysteine                               | 120    | 33.2   |        | 1.31 | 10 |
| Cytidine                               | 242.1  | 109    |        | 1.8  | 8  |
|                                        | 242.1  |        | 42.2   | 1.8  | 16 |
| Cytidine 5-diphosphate                 | 402.01 | 79     |        | 14.4 | 48 |
|                                        | 402.01 |        | 158.92 | 14.4 | 24 |
| Cytidine 5-triphosphate                | 482    | 158.8  |        | 17   | 40 |
|                                        | 482    |        | 79     | 17   | 40 |
| Cytidine-5-monophosphate               | 322    | 79     |        | 9.7  | 44 |
|                                        | 322    |        | 97     | 9.7  | 22 |
| Cytosine                               | 110    | 67.1   |        | 1.4  | 8  |
|                                        | 110    |        | 42.2   | 1.4  | 12 |
| D-+-Galactosamine                      | 238.1  | 159.9  |        | 1.1  | 8  |
|                                        | 238.1  |        | 100    | 1.1  | 6  |
| Deoxyadenosine 5-triphosphate          | 490    | 391.9  |        | 17.2 | 24 |
|                                        | 490    |        | 158.9  | 17.2 | 32 |
| Deoxycytidine 5-triphosphate           | 466    | 158.9  |        | 16.8 | 28 |
|                                        | 466    |        | 367.9  | 16.8 | 20 |
| Deoxyguanosine 5-triphosphate          | 506    | 407.9  |        | 17.2 | 20 |
|                                        | 506    |        | 158.8  | 17.2 | 32 |
| Deoxythymidine 5-triphosphate          | 481    | 158.8  |        | 17.2 | 36 |
|                                        | 481    |        | 383.1  | 17.2 | 20 |
| D-erythro-Dihydroshingosine            | 300.3  | 199    |        | 8.9  | 8  |
|                                        | 300.3  |        | 282    | 8.9  | 6  |
| D-Fructose 1,6-biphosphate             | 338.9  | 97     |        | 14.8 | 22 |
|                                        | 338.9  |        | 241.01 | 14.8 | 12 |
| D-Fructose 6-phosphate                 | 259    | 79     |        | 7.6  | 48 |
|                                        | 259    |        | 97     | 7.6  | 14 |
| D-Gluconic acid                        | 195.1  | 75.2   |        | 5.9  | 18 |
|                                        | 195.1  |        | 129    | 5.9  | 10 |
| D-Glucosamine 6-phosphate              | 258    | 79     |        | 1.6  | 48 |
|                                        | 258    |        | 97     | 1.6  | 16 |

|                                    |        |         |        |      |    |
|------------------------------------|--------|---------|--------|------|----|
| D-Glucose 6-phosphate              | 259    | 79      |        | 7.6  | 48 |
|                                    | 259    |         | 97     | 7.6  | 14 |
| Dihydroxyacetone phosphate         | 169    | 79      |        | 10.5 | 32 |
|                                    | 169    |         | 97     | 10.5 | 6  |
| DL-2-Aminoadipic acid              | 160.1  | 142     |        | 4.3  | 9  |
|                                    | 160.1  |         | 116    | 4.3  | 12 |
| DL-Glyceraldehyde 3-phosphate      | 169    | 79      |        | 11.7 | 28 |
|                                    | 169    |         | 97     | 11.7 | 4  |
| DL-Isocitric acid                  | 191    | 111.02  |        | 15.1 | 11 |
|                                    | 191    |         | 173    | 15.1 | 6  |
| D-Maltose                          | 341.1  | 161     |        | 1.3  | 5  |
|                                    | 341.1  |         | 179    | 1.3  | 4  |
| D-Mannose                          | 179.1  | 89      |        | 1.3  | 4  |
|                                    | 179.1  |         | 59.2   | 1.3  | 16 |
| D-pantothenic acid                 | 218    | 88      |        | 12.1 | 10 |
|                                    | 218    |         | 146.08 | 12.1 | 14 |
| D-Ribose 5-phosphate               | 229    | 79      |        | 8.5  | 48 |
|                                    | 229    |         | 97     | 8.5  | 10 |
| D-Ribulose 1,5-biphosphate         | 308.9  | 79      |        | 14.7 | 46 |
|                                    | 308.9  |         | 97     | 14.7 | 22 |
| D-Sedoheptulose-7-phosphate        | 289    | 96.9    |        | 8.2  | 18 |
|                                    | 289    |         | 79     | 8.2  | 48 |
| D-Xylose                           | 149.05 | 89.02   |        | 1.2  | 4  |
|                                    | 149.05 |         | 71.01  | 1.2  | 4  |
| D-Xylulose-5-phosphate             | 229    | 79      |        | 8.5  | 36 |
|                                    | 229    |         | 138.98 | 8.5  | 8  |
| Epicatechin                        | 289.1  | 245     |        | 12.2 | 11 |
|                                    | 289.1  |         | 109    | 12.2 | 26 |
| Flavin adenine dinucleotide        | 784.1  | 346     |        | 17   | 35 |
|                                    | 784.1  |         | 437    | 17   | 30 |
| Folinic acid                       | 472.2  | 315     |        | 14.8 | 28 |
|                                    | 472.2  |         | 343    | 14.8 | 20 |
| Galactonic acid                    | 195.1  | 75.1    |        | 5.9  | 18 |
|                                    | 195.1  |         | 129    | 5.9  | 11 |
| gamma-Aminobutyric acid            | 102    | 84.1    |        | 1.2  | 8  |
| gamma-Glu-Cys                      | 249.1  | 128     |        | 8.1  | 8  |
|                                    | 249.1  |         | 171    | 8.1  | 9  |
| Glucoheptonic acid                 | 225.1  | 129     |        | 5.8  | 11 |
|                                    | 225.1  |         | 75.1   | 5.8  | 18 |
| Glutathione Reduced                | 306.1  | 143     |        | 8.43 | 17 |
|                                    | 306.1  |         | 128.1  | 8.43 | 17 |
| Glyceric acid                      | 105    | 75.1    |        | 5.9  | 8  |
|                                    | 105    |         | 57.2   | 5.9  | 14 |
| Glyoxylic acid                     | 73     | 45.2    |        | 5.9  | 6  |
| Guanine                            | 150    | 133.02  |        | 2    | 12 |
|                                    | 150    |         | 66.01  | 2    | 36 |
| Guanosine                          | 282.1  | 150     |        | 3.9  | 17 |
|                                    | 282.1  |         | 132.9  | 3.9  | 32 |
| Guanosine 3,5-cyclic monophosphate | 344    | 150.042 |        | 12.2 | 24 |
|                                    | 344    |         | 133.02 | 12.2 | 44 |
| Guanosine 5-diphosphate            | 442    | 150     |        | 14.8 | 31 |
|                                    | 442    |         | 158.9  | 14.8 | 20 |
| Guanosine 5-triphosphate           | 522.3  | 158.9   |        | 17   | 36 |
|                                    | 522.3  |         | 424    | 17   | 20 |
| Homocitrate                        | 205    | 125     |        | 15.4 | 10 |
|                                    | 205    |         | 145    | 15.4 | 10 |

|                           |       |        |        |       |    |
|---------------------------|-------|--------|--------|-------|----|
| Hypoxanthine              | 135   | 92     |        | 2     | 17 |
|                           | 135   |        | 65.1   | 2     | 28 |
| Indoline-2-carboxylate    | 162.1 | 116    |        | 16.1  | 16 |
|                           | 162.1 |        | 118    | 16.1  | 11 |
| Inosine                   | 267.1 | 135    |        | 3.3   | 22 |
|                           | 267.1 |        | 108    | 3.3   | 44 |
| Inosine 5-diphosphate     | 427   | 158.9  |        | 14.5  | 28 |
|                           | 427   |        | 135    | 14.5  | 24 |
| Inosine 5-monophosphate   | 347   | 79     |        | 11.1  | 44 |
|                           | 347   |        | 97     | 11.1  | 22 |
| Inosine 5-triphosphate    | 507   | 409    |        | 17.2  | 19 |
|                           | 507   |        | 159    | 17.2  | 40 |
| Isopentenyl pyrophosphate | 245   | 209    |        | 12.8  | 4  |
| Isopentyl acetate         | 129.1 | 85.2   |        | 14.6  | 6  |
|                           | 129.1 |        | 41.2   | 14.6  | 12 |
| Itaconic acid             | 129   | 85.1   |        | 13.6  | 6  |
|                           | 129   |        | 41.3   | 13.6  | 12 |
| Ketoisovaleric acid       | 115   | 71.2   |        | 16.56 | 4  |
| Ketovaleric acid          | 115   | 71.2   |        | 14.5  | 4  |
| Lactic acid               | 89    | 43.3   |        | 7.4   | 10 |
|                           | 89    |        | 45.3   | 7.4   | 9  |
| L-Arabinose               | 149   | 89.1   |        | 1.4   | 4  |
|                           | 149   |        | 59.2   | 1.4   | 12 |
| L-Arabitol                | 151   | 89     |        | 1.3   | 12 |
|                           | 151   |        | 71.02  | 1.3   | 16 |
| L-Arginine                | 173.1 | 131    |        | 1.1   | 11 |
|                           | 173.1 |        | 156    | 1.1   | 8  |
| L-asparagine              | 131   | 113    |        | 1.2   | 4  |
|                           | 131   |        | 70     | 1.2   | 12 |
| L-Aspartic Acid           | 132   | 88     |        | 4.9   | 10 |
|                           | 132   |        | 71     | 4.9   | 14 |
| L-Canavanine              | 175.1 | 74.04  |        | 1.1   | 10 |
|                           | 175.1 |        | 118    | 1.1   | 8  |
| L-Carnitine               | 220.1 | 146    |        | 1.2   | 4  |
| L-Citrulline              | 174.1 | 131    |        | 1.3   | 8  |
|                           | 174.1 |        | 42.2   | 1.3   | 48 |
| L-Cystathionine           | 221.1 | 134    |        | 1.3   | 8  |
|                           | 221.1 |        | 120    | 1.3   | 9  |
| L-Cystine                 | 239   | 74.1   |        | 1.2   | 20 |
|                           | 239   |        | 120    | 1.2   | 4  |
| L-Dihydroorotic acid      | 157   | 113    |        | 7.3   | 5  |
|                           | 157   |        | 42.2   | 7.3   | 30 |
| L-Glutamic acid           | 146   | 102    |        | 4.5   | 11 |
|                           | 146   |        | 128    | 4.5   | 8  |
| L-Glutamine               | 145.1 | 127    |        | 1.3   | 7  |
|                           | 145.1 |        | 109    | 1.3   | 10 |
| L-Glutathione (oxidized)  | 611.1 | 306.07 |        | 13.6  | 24 |
|                           | 611.1 |        | 272.09 | 13.6  | 28 |
| L-Histidine               | 154.1 | 137    |        | 1.1   | 12 |
|                           | 154.1 |        | 93.1   | 1.1   | 16 |
| L-Homocysteine            | 134   | 116.9  |        | 1.4   | 8  |
| L-Homocystine             | 267   | 132    |        | 1.5   | 8  |
|                           | 267   |        | 115    | 1.5   | 16 |
| L-Homoserine              | 118   | 72.1   |        | 1.3   | 10 |
|                           | 118   |        | 55     | 1.3   | 16 |
| L-Hydroxyglutaric acid    | 147   | 128.9  |        | 13.8  | 7  |



|                                        |       |        |       |      |    |
|----------------------------------------|-------|--------|-------|------|----|
|                                        | 147   |        | 85.1  | 13.8 | 13 |
| Lipoamide                              | 204.1 | 158    |       | 16.8 | 4  |
|                                        | 204.1 |        | 64.1  | 16.8 | 20 |
| L-Isoleucine                           | 130   | 45     |       | 2.1  | 16 |
| L-Kynurenine                           | 207.1 | 190    |       | 3.9  | 4  |
|                                        | 207.1 |        | 144   | 3.9  | 20 |
| L-Leucine                              | 130   | 45     |       | 2.1  | 16 |
| L-Malic acid                           | 133   | 115    |       | 13.8 | 8  |
|                                        | 133   |        | 71.1  | 13.8 | 14 |
| L-Methionine                           | 148   | 47.2   |       | 1.8  | 12 |
|                                        | 148   |        | 100   | 1.8  | 6  |
| L-Phenylalanine                        | 164.1 | 147    |       | 4.5  | 9  |
|                                        | 164.1 |        | 103   | 4.5  | 15 |
| L-Proline                              | 114   | 68.1   |       | 1.3  | 12 |
|                                        | 114   |        | 45.2  | 1.3  | 12 |
| L-Serine                               | 104   | 74.1   |       | 1.2  | 8  |
| L-Sorbose                              | 179.1 | 89     |       | 1.3  | 4  |
|                                        | 179.1 |        | 71.02 | 1.3  | 14 |
| L-Threonine                            | 118   | 74.1   |       | 1.3  | 9  |
| L-Tryptophan                           | 203.1 | 116    |       | 7.9  | 14 |
|                                        | 203.1 |        | 74.1  | 7.9  | 14 |
| L-Tyrosine                             | 180   | 119    |       | 2.3  | 15 |
|                                        | 180   |        | 93    | 2.3  | 12 |
| Maleic acid                            | 115   | 71.2   |       | 12.8 | 7  |
|                                        | 115   |        | 27.3  | 12.8 | 15 |
| Malonic acid                           | 103   | 59.2   |       | 12.8 | 7  |
|                                        | 103   |        | 41.3  | 12.8 | 32 |
| Melibiose                              | 341.1 | 179    |       | 1.3  | 4  |
|                                        | 341.1 |        | 89    | 1.3  | 13 |
| Mevalonic acid                         | 147.1 | 128.9  |       | 9.8  | 8  |
|                                        | 147.1 |        | 103.1 | 9.8  | 11 |
| Mevalonic acid 5-phosphate             | 227   | 79     |       | 14.8 | 40 |
|                                        | 227   |        | 97    | 14.8 | 12 |
| m-Hydroxybenzoic acid                  | 137   | 93.1   |       | 13.4 | 10 |
|                                        | 137   |        | 65.2  | 13.4 | 28 |
| myo-Inositol                           | 179   | 71.02  |       | 1.3  | 12 |
|                                        | 239.1 | 179    |       | 1.3  | 0  |
| N-Acetyl D-galactosamine               | 220.1 | 119    |       | 1.2  | 0  |
| N-Acetyl-alpha-D-glucosamine 1-phospha | 300   | 97     |       | 8.7  | 16 |
|                                        | 300   |        | 79    | 8.7  | 36 |
| N-acetylaspartate                      | 174   | 88.1   |       | 14   | 14 |
|                                        | 174   |        | 58.1  | 14   | 22 |
| N-acetylaspartylglutamate              | 303.1 | 285    |       | 16.1 | 6  |
|                                        | 303.1 |        | 128   | 16.1 | 14 |
| N-Acetyl-D-glucosamine 6-phosphate     | 300   | 97     |       | 8.8  | 18 |
|                                        | 300   |        | 79    | 8.8  | 48 |
| N-Acetylglutamic acid                  | 188.1 | 128.04 |       | 14.1 | 10 |
|                                        | 188.1 |        | 102   | 14.1 | 16 |
| N-Acetylneuraminic acid                | 308.1 | 87     |       | 6.2  | 14 |
|                                        | 308.1 |        | 169.9 | 6.2  | 10 |
| N-Carbamoyl-DL-aspartic acid           | 175   | 132    |       | 13.5 | 7  |
|                                        | 175   |        | 88.1  | 13.5 | 19 |
| N-Carbamyl-L-glutamic acid             | 189.1 | 146    |       | 13.6 | 7  |
|                                        | 189.1 |        | 102.1 | 13.6 | 20 |
| N-Formyl-L-Tyrosine                    | 208.1 | 164    |       | 12.8 | 7  |
|                                        | 208.1 |        | 107   | 12.8 | 12 |

|                               |        |       |       |       |    |
|-------------------------------|--------|-------|-------|-------|----|
| Nicotinic acid                | 122    | 78.1  |       | 11.9  | 11 |
|                               | 122    |       | 51.2  | 11.9  | 32 |
| Nicotinic acid mononucleotide | 334    | 289.9 |       | 8.6   | 4  |
|                               | 334    |       | 79    | 8.6   | 40 |
| o-Hydroxy hippuric acid       | 194    | 150   |       | 16.5  | 11 |
|                               | 194    |       | 121   | 16.5  | 22 |
| o-Phospho-L-Serine            | 184    | 79    |       | 10.2  | 36 |
|                               | 184    |       | 97    | 10.2  | 13 |
| O-Phosphorylethanolamine      | 140    | 79    |       | 1.7   | 14 |
|                               | 140    |       | 63    | 1.7   | 38 |
| Orotic acid                   | 155    | 42    |       | 9.1   | 26 |
|                               | 155    |       | 40    | 9.1   | 44 |
| O-Succinyl-L-homoserine       | 218.1  | 117   |       | 6.5   | 7  |
|                               | 218.1  |       | 118   | 6.5   | 0  |
| Oxamic acid                   | 88     | 44.3  |       | 6.5   | 6  |
|                               | 88     |       | 42.3  | 6.5   | 12 |
| Phenylpyruvic acid            | 163    | 91.1  |       | 17.2  | 6  |
| Phosphoenolpyruvic acid       | 167    | 79    |       | 15.3  | 12 |
| Prephenic acid                | 225    | 101   |       | 12.4  | 9  |
| Pyridoxal 5 phosphate         | 246    | 79    |       | 14.8  | 30 |
| Pyridoxal hydrochloride       | 166.1  | 138   |       | 2.4   | 12 |
|                               | 166.1  |       | 108   | 2.4   | 18 |
| Pyridoxamine                  | 167.1  | 121   |       | 1.1   | 22 |
|                               | 167.1  |       | 122   | 1.1   | 18 |
| Pyridoxine                    | 168.1  | 122.1 |       | 2.4   | 17 |
|                               | 168.1  |       | 166   | 2.4   | 9  |
| Pyruvic acid                  | 87     | 43.2  |       | 9.5   | 4  |
| Quinic acid                   | 191.1  | 85.1  |       | 6     | 25 |
|                               | 191.1  |       | 93.1  | 6     | 24 |
| Riboflavin                    | 375.1  | 255   |       | 12.6  | 14 |
|                               | 375.1  |       | 212   | 12.6  | 28 |
| Ribonic acid gamma lactone    | 147    | 59.2  |       | 1.5   | 16 |
|                               | 147    |       | 99    | 1.5   | 8  |
| S-2-Aminoethyl-L-cysteine     | 163.1  | 76.1  |       | 1.1   | 10 |
|                               | 163.1  |       | 33.2  | 1.1   | 28 |
| S-5-Adenosyl-L-homocysteine   | 383.1  | 134   |       | 5.3   | 24 |
|                               | 383.1  |       | 248   | 5.3   | 13 |
| Salicylic acid                | 137    | 93.1  |       | 16.8  | 17 |
|                               | 137    |       | 65.2  | 16.8  | 33 |
| Shikimic acid                 | 173    | 111   |       | 5.8   | 7  |
|                               | 173    |       | 93.1  | 5.8   | 16 |
| Succinic acid                 | 117    | 73.1  |       | 13    | 10 |
|                               | 117    |       | 99    | 13    | 8  |
| Succinic semialdehyde         | 101    | 57.2  |       | 7.1   | 7  |
| Taurine                       | 124    | 80    |       | 1.3   | 24 |
| Taurocholic acid              | 514    | 514   |       | 20.7  | 50 |
| Thiamine                      | 264.1  | 234   |       | 1.1   | 6  |
|                               | 264.1  |       | 148   | 1.1   | 18 |
| Thymidine                     | 241.1  | 42.2  |       | 5.5   | 16 |
|                               | 241.1  |       | 151   | 5.5   | 6  |
| Thymidine 5-diphosphate       | 401.01 | 97    |       | 15.4  | 25 |
|                               | 401.01 |       | 79    | 15.4  | 44 |
| Thymine                       | 125    | 42.2  |       | 2.7   | 14 |
| trans-4-Hydroxy-L-proline     | 130.1  | 128   |       | 1.3   | 12 |
|                               | 130.1  |       | 66.03 | 1.3   | 16 |
| trans-Aconitic acid           | 173    | 129   |       | 15.55 | 4  |

|                               |       |       |       |       |    |
|-------------------------------|-------|-------|-------|-------|----|
|                               | 173   |       | 85.1  | 15.55 | 10 |
| trans-trans Muconic acid      | 141   | 53.3  |       | 14.7  | 8  |
| Trehalose                     | 341   | 89.01 |       | 1.3   | 12 |
|                               | 401.1 | 341   |       | 1.3   | 10 |
| Trehalose 6-phosphate         | 421.1 | 241   |       | 7.9   | 27 |
| Uracil                        | 111   | 42.2  |       | 1.7   | 14 |
| Uric acid                     | 167   | 124   |       | 5.5   | 13 |
|                               | 167   |       | 42.3  | 5.5   | 26 |
| Uridine                       | 243.1 | 200   |       | 2.3   | 6  |
|                               | 243.1 |       | 110   | 2.3   | 12 |
| Uridine 5-diphosphate         | 403   | 158.9 |       | 14.8  | 28 |
|                               | 403   |       | 79    | 14.8  | 48 |
| Uridine 5'-diphosphogalactose | 565   | 322.9 |       | 14.3  | 24 |
|                               | 565   |       | 384.9 | 14.3  | 29 |
| Uridine 5-diphosphoglucose    | 565   | 322.9 |       | 14.3  | 24 |
|                               | 565   |       | 384.9 | 14.3  | 28 |
| Uridine 5-monophosphate       | 323   | 79.1  |       | 10.8  | 48 |
|                               | 323   |       | 97    | 10.8  | 24 |
| Uridine 5-triphosphate        | 483   | 158.9 |       | 17    | 36 |
|                               | 483   |       | 385   | 17    | 20 |
| Vanillic acid                 | 167   | 123   |       | 12.6  | 9  |
|                               | 167   |       | 108   | 12.6  | 18 |
| Xanthine                      | 151   | 108   |       | 2.1   | 16 |
|                               | 151   |       | 42.2  | 2.1   | 24 |
| Xanthosine                    | 283.1 | 151   |       | 8.2   | 18 |
|                               | 283.1 |       | 108   | 8.2   | 40 |
| Xylitol                       | 151.1 | 89    |       | 1.3   | 8  |
|                               | 151.1 |       | 71    | 1.3   | 8  |
